# Supplementary material
Source: PubMed Central journal article supplement (PMC6563564)

## Supplementary Online Content

Makkar RR, Yoon S-H, Leon MB, et al. Association between transcatheter aortic valve replacement for bicuspid vs tricuspid aortic stenosis and mortality or stroke. *JAMA*. doi:10.1001/jama.2019.7108

### **eAppendix.** Statistical Analysis

**eTable 1.** Missing Baseline Characteristic Values

**eTable 2.** Procedural Characteristics and In-Hospital Outcomes in Unadjusted Cohort

**eTable 3.** 30-Day and 1-Year Clinical Outcomes in Unadjusted Cohort

**eTable 4.** Adjusted Hazard Ratios for Adverse Outcomes of TAVR in Bicuspid AS Compared With Tricuspid AS

**eTable 5.** Adjusted Hazard Ratios for 30 Days Mortality of TAVR in Bicuspid AS Compared With Tricuspid AS

**eTable 6.** Adjusted Hazard Ratios for 30 Days Stroke of TAVR in Bicuspid AS Compared With Tricuspid

**eTable 7.** Adjusted Hazard Ratios for 1 Year Mortality of TAVR in Bicuspid AS Compared With Tricuspid AS

**eTable 8.** Adjusted Hazard Ratios for 1 Year Stroke of TAVR in Bicuspid AS Compared With Tricuspid

**eTable 9.** Postprocedural Echocardiographic Data in Matched Cohort

**eTable 10.** Functional and Health Status in Matched Cohort

**eFigure 1.** Numbers of 1-Year Follow-up Status

**eFigure 2.** Cumulative Event Rates of All-Cause Mortality or Stroke After Transcatheter Aortic Valve Replacement in Patients with Bicuspid and Tricuspid Aortic Stenosis

**eFigure 3.** Cumulative Event Rates of All-Cause Mortality or Stroke Among Patients with Bicuspid and Tricuspid Aortic Stenosis in Propensity-Matched Cohort with CMS-Linkage

This supplementary material has been provided by the authors to give readers additional information about their work.

## Appendix

### Statistical Analysis

Continuous variables were presented as mean with standard deviation (SD) or median with interquartile range (IQR) and were compared between groups using the two-sample t-tests or Wilcoxon rank sums tests. Categorical variables were given as frequencies and percentages and were compared using chi-square tests or Fisher's exact tests with two-tailed. 30-day and 1-year adverse event rates were based on Kaplan-Meier estimates and all comparisons were made using the log-rank test.

It was anticipated that bicuspid and tricuspid AS patients would have significantly different baseline and procedural characteristics.<sup>24</sup> To avoid confounding due to these differences, propensity score-based matching was utilized. Propensity-scores were calculated using a logistic regression model based on 25 relevant baseline patient characteristics (covariates) with aortic valve type (bicuspid or tricuspid AS) as the dependent variable. The covariates were age, gender (male), body mass index, access site, prior percutaneous coronary intervention (PCI), prior coronary artery bypass graft surgery (CABG), prior stroke, carotid stenosis, peripheral arterial disease, hypertension, diabetes, chronic lung disease, immunocompromise, porcelain aorta, atrial fibrillation, creatinine, haemoglobin, estimated glomerular filtration ratio (GFR), aortic valve mean gradient, left ventricular ejection fraction, mitral regurgitation, tricuspid regurgitation, New York Heart Association (NYHA) functional class III/IV, five meter walk test, and Kansas City Cardiomyopathy Questionnaire (KCCQ) overall summary score. Missing baseline values were imputed using the Markov Chain Monte Carlo method prior to modelling. Bicuspid AS patients were matched one-to-one to tricuspid AS patients using a greedy matching strategy with calliper of 0.01, producing two patient cohorts (n = 2691 for each group). Balance between the groups was assessed by calculating standardized differences for which a difference of less than 0.10 was considered to indicate good balance. There were missing data for less than 3% of the patients for the baseline variables. There were greater percentages of missing data for carotid stenosis (21.3%), myocardial infarction (17.0%), Five meter walk test (23.6%) and KCCQ-OS (7.8%). The percentages of missing data for other variables were shown in the eTable 1.

This study is based on the ongoing registry which continuously enrolled all patients undergoing commercial TAVR in the United States. At any given time, only a fraction of the patients in the TVT registry have reached the 1-year end-point. Consequently, of the 92262 patients enrolled in our study, 23631 TAVRs (bicuspid, n=880 of 2921 and tricuspid, n=22751 of 81485) were performed in the preceding year and have not reached the 1-year endpoint. This registry is a national registry in which clinical follow-up is not mandated, and therefore, a fraction of patients who have reached the 1-year endpoint are not followed after the index procedure. To overcome these limitations, we linked data between the study cohort and Centers for Medicare and Medicaid Services (CMS), based on the high concordance in the mortality and other events using claims data as compared to clinician-triggered adjudication.<sup>25</sup> The coprimary endpoints analyses were performed using the CMS-linked data available from 2015 through 2017, including 32346 patients

(bicuspid AS, n=836 and tricuspid AS, n=31510). The patient follow up ended on November 2018. In addition, coprimary endpoints were assessed in the propensity matched cohort created in patients who had CMS data available for linkage (784 pairs of patients) as well as those who had CMS-linkage and completed 1-year endpoint (469 pairs of patients).

We performed Cox regression model using stepwise selection with entry/stay criteria 0.1/0.1 to assess the adjusted hazard ratio of bicuspid vs tricuspid patients on coprimary endpoints. The candidate covariates were identical to those used in the propensity-score matching analysis. We used Kolmogorov-type supremum test for all the covariates in the Cox model and no violations were found. All *P* values were 2-sided and *P* <.05 was considered significant for all tests. No adjustment for multiple testing was undertaken. Because of the potential for type 1 error due to multiple comparisons, findings of analyses for secondary endpoints should be interpreted as exploratory. All statistical analyses were performed using SAS version 9.4 (SAS Institute Inc., Cary, NC). We used SAS Proc MI for multiple imputation, Proc Phreg for cox regression model, and Proc logistics for propensity score calculation.

### **Definition of hostile chest and porcelain aorta.**

Hostile Chest – S#4182

Indicate if the patient has a medical condition that precludes an open chest procedure and that is documented in the medical record. This can include any of the following or other reasons that make redo operation through sternotomy or right anterior thoracotomy prohibitively hazardous:

1. Evidence of abnormal chest wall anatomy due to severe kyphoscoliosis or other skeletal abnormalities (including thoracoplasty, Potts' disease, sternal bone destruction, evidence of indetectable plane between posterior sternal table and important mediastinal structures)
2. Complications from prior surgery
3. Prior radiation involving the mediastinum/thoracic, or evidence of severe radiation damage (e.g., skin burns, bone destruction, muscle loss, lung fibrosis or esophageal stricture)
4. History of multiple recurrent pleural effusions causing internal adhesions.
5. Chronic, ongoing open skin defects or extremely severe soft tissue atrophy.
6. Complete absence of reconstructive options based on plastic surgeon consult.

## Porcelain Aorta – S#5045

Indicate if the patient has a porcelain aorta as documented by findings on a chest x-ray, CT scan, fluoroscopy at the time of cardiac catheterization or noted during previous cardiothoracic surgery.

### Supporting Definitions:

A porcelain aorta is defined as "severe atherosclerosis of the aorta, calcification may be severe and diffuse, causing an eggshell appearance seen on chest x-ray or CT".

Source: ACCF/AHA/AATS/ACR/ASA/SCA/SCAI/SIR/STS/SVM Guidelines for the Diagnosis and Management of Patients With Thoracic Aortic Disease (JACC, 2010; 55:27-129)

**eTable 1. Missing Baseline Characteristic Values**

| Characteristic                            | % Missing Value |
|-------------------------------------------|-----------------|
| Age                                       | 0.01            |
| Body mass index, kg/m <sup>2</sup>        | 0.44            |
| Male                                      | 0.02            |
| Prior PCI                                 | 0.23            |
| Prior CABG                                | 0.19            |
| Prior stroke                              | 0.15            |
| Carotid stenosis                          | 21.29           |
| Peripheral vascular disease               | 0.2             |
| Hypertension                              | 0.14            |
| Diabetes mellitus                         | 0.2             |
| Chronic lung disease                      | 0.63            |
| Immunocompromise Present                  | 0.22            |
| Porcelain aorta                           | 0.22            |
| Atrial fibrillation/flutter               | 0.21            |
| Hemoglobin                                | 0.38            |
| Creatinine                                | 0.39            |
| Estimated GFR, mL/min/1.73 m <sup>2</sup> | 0.41            |
| Myocardial Infarction                     | 17.04           |
| Tricuspid Insufficiency                   | 0.82            |
| Average mean gradient, mm Hg              | 1.22            |
| LVEF                                      | 0.66            |
| Approach                                  | 0.04            |
| Five meter walk test                      | 23.59           |
| KCCQ                                      | 7.81            |
| NYHA III/IV                               | 0.81            |

CABG = coronary artery bypass graft; GFR = glomerular filtration rate; KCCQ = Kansas City Cardiomyopathy Questionnaire; LVEF = left ventricular ejection fraction; NYHA = New York Heart Association; PCI = percutaneous coronary intervention

**eTable 2. Procedural Characteristics and In-Hospital Outcomes in Unadjusted Cohort**

| Characteristic                   | Bicuspid AS<br>(n = 2726) | Tricuspid AS<br>(n = 79096) | Absolute difference<br>(95% CI) | P Value |
|----------------------------------|---------------------------|-----------------------------|---------------------------------|---------|
| Procedure status                 |                           |                             |                                 |         |
| Elective                         | 90.3                      | 91.7                        | 1.4 (0.2 to 2.5)                | .01     |
| Urgent                           | 9.3                       | 8.1                         | 1.2 (0.1 to 2.4)                | .02     |
| Emergent                         | 0.3                       | 0.2                         | 0.1 (0.1 to 0.3)                | .16     |
| Salvage                          | 0.1                       | 0.0                         | 0.1 (-0.1 to 0.2)               | .10     |
| Cardiopulmonary bypass           | 1.4                       | 0.6                         | 0.9 (0.4 to 1.3)                | <0.001  |
| Access site                      |                           |                             |                                 |         |
| Transfemoral                     | 93.7                      | 94.3                        | 0.6 (-1.6 to 0.3)               | .17     |
| Transapical                      | 1.7                       | 1.5                         | 0.1 (-0.4 to 0.6)               | .61     |
| Transaortic                      | 1.0                       | 1.0                         | 0.1 (-0.5 to 0.3)               | .77     |
| Subclavian                       | 1.7                       | 1.4                         | 0.3 (-0.2 to 0.8)               | .18     |
| Prosthesis size                  |                           |                             |                                 |         |
| 20 mm                            | 2.7                       | 3.6                         | 1.0 (0.3 to 1.6)                | .009    |
| 23 mm                            | 22.9                      | 33.6                        | 10.7 (9.1 to 12.3)              | <.001   |
| 26 mm                            | 39.0                      | 41.0                        | 2.0 (0.2 to 3.9)                | .03     |
| 29 mm                            | 35.5                      | 21.8                        | 13.7 (11.9 to 15.5)             | <.0001  |
| Implant success                  | 99.0                      | 99.3                        | 0.3 (-0.7 to 0.1)               | .09     |
| Device success                   | 96.5                      | 97.4                        | 0.9 (0.2 to 1.7)                | .002    |
| Conversion to open heart surgery | 0.9                       | 0.4                         | 0.5 (0.1 to 0.8)                | .0003   |
| Annulus rupture                  | 0.3                       | 0.1                         | 0.2 (0.0 to 0.4)                | .02     |
| Ventricular rupture              | 0.1                       | 0.1                         | 0.0 (-0.1 to 0.1)               | >. 99   |

|                                       |     |     |                   |      |
|---------------------------------------|-----|-----|-------------------|------|
| Device embolization to left ventricle | 0.1 | 0.0 | 0.1 (-0.1 to 0.2) | .02  |
| Coronary occlusion                    | 0.1 | 0.0 | 0.1 (-0.1 to 0.2) | .03  |
| Other                                 | 0.3 | 0.2 | 0.2 (-0.1 to 0.4) | .16  |
| Procedure complications               |     |     |                   |      |
| Annular dissection                    | 0.3 | 0.2 | 0.1 (-0.1 to 0.4) | .08  |
| Aortic dissection                     | 0.3 | 0.1 | 0.1 (-0.1 to 0.3) | .13  |
| Coronary compression or obstruction   | 0.4 | 0.1 | 0.3 (0.0 to 0.5)  | .002 |
| Device embolization to aorta          | 0.0 | 0.1 | 0.1 (0.0 to 0.1)  | .41  |
| Device embolization to left ventricle | 0.1 | 0.0 | 0.1 (-0.1 to 0.2) | .05  |
| Perforation                           | 0.9 | 0.9 | 0.0 (-0.4 to 0.4) | .98  |
| Need for second valve                 | 0.4 | 0.3 | 0.2 (-0.1 to 0.4) | .12  |
| In-hospital event                     |     |     |                   |      |
| Death                                 | 1.7 | 1.5 | 0.1 (-0.4 to 0.6) | .64  |
| Stroke                                | 2.1 | 1.4 | 0.6 (0.0 to 1.2)  | .01  |
| Death or stroke                       | 3.4 | 2.8 | 0.6 (-0.1 to 1.3) | .08  |
| Myocardial infarction                 | 0.3 | 0.2 | 0.1 (-0.1 to 0.4) | .09  |
| Life-threatening bleeding             | 0.0 | 0.0 |                   | --   |
| Major vascular complication           | 0.8 | 1.0 | 0.2 (-0.6 to 0.2) | .31  |
| New requirement for dialysis          | 0.4 | 0.5 | 0.1 (-0.3 to 0.2) | .63  |
| New permanent pacemaker               | 7.2 | 7.6 | 0.4 (-1.4 to 0.6) | .42  |
| New-onset atrial fibrillation         | 1.7 | 1.8 | 0.2 (-0.7 to 0.4) | .54  |

Abbreviations: AS, aortic valve stenosis.

**eTable 3. 30-Day and 1-Year Clinical Outcomes in Unadjusted Cohort**

|                              | Bicuspid AS<br>(n = 2726) | Tricuspid AS<br>(n = 79096) | Hazard Ratio<br>(95% CI) | Absolute Difference<br>(95% CI) | Log-rank<br><i>P</i> Value |
|------------------------------|---------------------------|-----------------------------|--------------------------|---------------------------------|----------------------------|
| At 30 days                   |                           |                             |                          |                                 |                            |
| Mortality                    | 65 (2.5)                  | 1887 (2.5)                  | 1.01 (0.79 to 1.30)      | 0.03 (0.02 to 0.04)             | .91                        |
| Stroke                       | 64 (2.4)                  | 1506 (2.0)                  | 1.25 (0.97 to 1.60)      | 0.46 (0.46 to 0.47)             | .08                        |
| Mortality or stroke          | 115 (4.4)                 | 3150 (4.1)                  | 1.07 (0.89 to 1.29)      | 0.27 (0.26 to 0.27)             | .45                        |
| Aortic valve re-intervention | 10 (0.4)                  | 366 (0.5)                   | 0.80 (0.43 to 1.49)      | 0.09 (0.09 to 0.09)             | .48                        |
| New pacemaker                | 236 (9.0)                 | 6994 (9.1)                  | 0.99 (0.87 to 1.12)      | 0.1 (0.09 to 0.11)              | .83                        |
| Valve related readmissions   | 15 (0.6)                  | 457 (0.6)                   | 0.97 (0.58 to 1.62)      | 0.02 (0.02 to 0.03)             | .91                        |
| At 1 year                    |                           |                             |                          |                                 |                            |
| Mortality                    | 171 (10.4)                | 7167 (14.4)                 | 0.75 (0.65 to 0.87)      | 3.97 (3.95 to 3.99)             | .00                        |
| Stroke                       | 76 (3.4)                  | 2200 (3.7)                  | 1.04 (0.83 to 1.31)      | 0.29 (0.28 to 0.30)             | .72                        |
| Mortality or stroke          | 228 (12.8)                | 8749 (16.7)                 | 0.81 (0.71 to 0.93)      | 3.95 (3.93 to 3.96)             | .002                       |
| Aortic valve re-intervention | 14 (0.7)                  | 451 (0.7)                   | 0.92 (0.54 to 1.57)      | 0.01 (0.0 to 0.01)              | .77                        |
| New pacemaker                | 247 (9.8)                 | 7489 (10.3)                 | 0.97 (0.85 to 1.10)      | 0.42 (0.41 to 0.43)             | .62                        |
| Valve related readmissions   | 28 (1.5)                  | 922 (1.7)                   | 0.93 (0.64 to 1.36)      | 0.2 (0.2 to 0.21)               | .72                        |

Abbreviations: AS, aortic valve stenosis; CI, confidence interval.



**eTable 4. Adjusted Hazard Ratios for Adverse Outcomes of TAVR in Bicuspid AS Compared With Tricuspid AS**

| Outcomes                  | Hazard ratio<br>(95% CI) | 95% CI       | <i>P</i> Value |
|---------------------------|--------------------------|--------------|----------------|
| 30-day mortality          |                          |              |                |
| Unadjusted                | 1.01                     | 0.79 to 1.30 | .91            |
| Multivariate adjusted     | 1.23                     | 0.84 to 1.81 | .28            |
| Propensity score matching | 1.04                     | 0.74 to 1.47 | .82            |
| 1-year mortality          |                          |              |                |
| Unadjusted                | 0.75                     | 0.65 to 0.87 | < .001         |
| Multivariate adjusted     | 1.01                     | 0.83 to 1.23 | .93            |
| Propensity score matching | 0.90                     | 0.73 to 1.10 | .31            |
| 30-day stroke             |                          |              |                |
| Unadjusted                | 1.25                     | 0.97 to 1.60 | .08            |
| Multivariate adjusted     | 1.47                     | 1.12 to 1.93 | .0056          |
| Propensity score matching | 1.57                     | 1.06 to 2.33 | .02            |
| 1-year stroke             |                          |              |                |
| Unadjusted                | 1.04                     | 0.83 to 1.31 | .72            |
| Multivariate adjusted     | 1.23                     | 0.94 to 1.62 | .14            |
| Propensity score matching | 1.28                     | 0.91 to 1.79 | .16            |

Abbreviations: CI, confidence interval.

**eTable 5. Adjusted Hazard Ratios for 30 Days Mortality of TAVR in Bicuspid AS Compared With Tricuspid AS**

| Variable                                              | Hazard ratio | 95% CI       | <i>P</i> Value |
|-------------------------------------------------------|--------------|--------------|----------------|
| Age                                                   | 1.02         | 1.01 to 1.03 | < .0001        |
| Body mass index, kg/m <sup>2</sup>                    | 0.97         | 0.96 to 0.98 | < .0001        |
| Hypertension                                          | 0.77         | 0.62 to 0.96 | .0175          |
| Estimated GFR per 10 units, mL/min/1.73m <sup>2</sup> | 0.92         | 0.90 to 0.95 | < .0001        |
| Atrial fibrillation/flutter                           | 1.25         | 1.09 to 1.42 | .0008          |
| Chronic lung disease                                  | 1.39         | 1.22 to 1.59 | < .0001        |
| Porcelain aorta                                       | 1.93         | 1.50 to 2.50 | < .0001        |
| Hemoglobin level, g/dL                                | 0.92         | 0.89 to 0.96 | < .0001        |
| KCCQ-OS score                                         | 0.99         | 0.99 to 0.99 | < .0001        |
| Five meter walk test, s                               | 1.01         | 1.00 to 1.01 | .0017          |
| Ejection fraction, %                                  | 0.99         | 0.99 to 1.00 | .007           |
| Moderate or severe mitral insufficiency               | 1.23         | 1.07 to 1.41 | .0027          |
| Transfemoral access                                   | 0.43         | 0.35 to 0.51 | < 0.0001       |
| Bicuspid AS                                           | 1.23         | 0.84 to 1.81 | .28            |

Abbreviations: AS, aortic valve stenosis; CI, confidence interval; GFR, glomerular filtration rate; KCCQ-OS, Kansas City

Cardiomyopathy Questionnaire overall summary.

**eTable 6. Adjusted Hazard Ratios for 30 Days Stroke of TAVR in Bicuspid AS Compared With Tricuspid AS**

| Variable                                              | Hazard ratio | 95% CI       | <i>P</i> Value |
|-------------------------------------------------------|--------------|--------------|----------------|
| Age                                                   | 1.02         | 1.01 to 1.03 | < .0001        |
| Male sex                                              | 0.74         | 0.67 to 0.82 | < .0001        |
| Body mass index, kg/m <sup>2</sup>                    | 0.98         | 0.98 to 0.99 | .0003          |
| Estimated GFR per 10 units, mL/min/1.73m <sup>2</sup> | 0.96         | 0.94 to 0.98 | .0002          |
| Prior stroke                                          | 1.59         | 1.39 to 1.83 | < .0001        |
| Moderate or severe tricuspid insufficiency            | 1.21         | 1.05 to 1.38 | .0063          |
| Transfemoral access                                   | 0.47         | 0.40 to 0.56 | < 0.0001       |
| Bicuspid AS                                           | 1.47         | 1.12 to 1.93 | .0056          |

Abbreviations: AS, aortic valve stenosis; CI, confidence interval; GFR, glomerular filtration rate.

**eTable 7. Adjusted Hazard Ratios for 1 Year Mortality of TAVR in Bicuspid AS Compared With Tricuspid AS**

| Variable                                              | Hazard ratio | 95% CI       | <i>P</i> Value |
|-------------------------------------------------------|--------------|--------------|----------------|
| Age                                                   | 1.02         | 1.02 to 1.03 | < .0001        |
| Male sex                                              | 1.18         | 1.10 to 1.26 | < .0001        |
| Body mass index, kg/m <sup>2</sup>                    | 0.97         | 0.96 to 0.97 | < .0001        |
| NYHA class III/IV heart failure                       | 1.12         | 1.04 to 1.22 | .004           |
| Hypertension                                          | 0.89         | 0.80 to 0.99 | .025           |
| Diabetes mellitus                                     | 1.11         | 1.04 to 1.18 | .0015          |
| Creatinine ≥2.0 mg/dL                                 | 1.25         | 1.10 to 1.41 | .0004          |
| Estimated GFR per 10 units, mL/min/1.73m <sup>2</sup> | 0.95         | 0.94 to 0.97 | < .0001        |
| Atrial fibrillation/flutter                           | 1.34         | 1.26 to 1.42 | < .0001        |
| Prior stroke                                          | 1.11         | 1.02 to 1.21 | .0199          |
| Peripheral artery disease                             | 1.12         | 1.05 to 1.20 | .0005          |
| Chronic lung disease                                  | 1.31         | 1.23 to 1.39 | < .0001        |
| Immunocompromised present                             | 1.37         | 1.25 to 1.51 | < .0001        |
| Porcelain aorta                                       | 1.19         | 1.03 to 1.37 | .0217          |
| Hemoglobin level, g/dL                                | 0.90         | 0.88 to 0.91 | < .0001        |
| KCCQ-OS score                                         | 0.99         | 0.99 to 0.99 | < .0001        |
| Five meter walk test, s                               | 1.01         | 1.00 to 1.01 | < .0001        |
| Mean gradient, mm Hg                                  | 0.99         | 0.99 to 1.00 | < .0001        |
| Ejection fraction, %                                  | 0.99         | 0.99 to 1.00 | < .0001        |
| Moderate or severe tricuspid insufficiency            | 1.22         | 1.14 to 1.31 | < .0001        |
| Transfemoral access                                   | 0.60         | 0.54 to 0.67 | < .0001        |
| Bicuspid AS                                           | 1.01         | 0.83 to 1.23 | .93            |

Abbreviations: AS, aortic valve stenosis; CI, confidence interval; GFR, glomerular filtration rate; KCCQ-OS, Kansas City

Cardiomyopathy Questionnaire overall summary; NYHA, New York Heart Association.

**eTable 8. Adjusted Hazard Ratios for 1 Year Stroke of TAVR in Bicuspid AS Compared With Tricuspid AS**

| Variable                                              | Hazard Ratio | 95% CI       | <i>P</i> Value |
|-------------------------------------------------------|--------------|--------------|----------------|
| Age                                                   | 1.02         | 1.01 to 1.03 | < .0001        |
| Body mass index, kg/m <sup>2</sup>                    | 0.98         | 0.97 to 0.99 | < .0001        |
| Diabetes mellitus                                     | 1.20         | 1.08 to 1.32 | .0005          |
| Estimated GFR per 10 units, mL/min/1.73m <sup>2</sup> | 0.95         | 0.93 to 0.97 | < .0001        |
| Prior stroke                                          | 1.74         | 1.54 to 1.97 | < .0001        |
| KCCQ-OS score,                                        | 1.00         | 0.99 to 1.00 | .0011          |
| Moderate or severe mitral insufficiency               | 1.19         | 1.07 to 1.33 | .0014          |
| Transfemoral access                                   | 0.56         | 0.48 to 0.65 | < .0001        |
| Bicuspid AS                                           | 1.23         | 0.94 to 1.62 | .14            |

Abbreviations: AS, aortic valve stenosis; CI, confidence interval; GFR, glomerular filtration rate; KCCQ-OS, Kansas City Cardiomyopathy Questionnaire overall summary.

**eTable 9. Postprocedural Echocardiographic Data in Matched Cohort**

|                                                      | Bicuspid AS<br>(n = 2691) | Tricuspid AS<br>(n = 2691) | Absolute Difference<br>(95% CI) | P Value |
|------------------------------------------------------|---------------------------|----------------------------|---------------------------------|---------|
| Discharge                                            |                           |                            |                                 |         |
| Aortic valve area, mean (SD), cm <sup>2</sup>        | 1.8 (0.6)                 | 1.8 (0.5)                  | 0.0 (0.0 to 0.05)               | .34     |
| Mean gradient, mean (SD), mm Hg                      | 11.6 (5.7)                | 11.8 (5.3)                 | 0.2 (-0.5 to 0.1)               | .15     |
| Mean gradient ≥ 20 mm Hg                             | 164/2371 (6.9)            | 196/2400 (8.2)             | 1.2 (-2.8 to 0.3)               | .10     |
| Prosthesis patient mismatch                          |                           |                            |                                 |         |
| None                                                 | 1165/2003 (58.2)          | 1186/2015 (58.9)           | 0.7 (-3.8 to 2.4)               | .65     |
| Moderate                                             | 563/2003 (28.1)           | 555/2015 (27.5)            | 0.6 (-2.3 to 3.4)               | .69     |
| Severe                                               | 275/2003 (13.7)           | 274/2015 (13.6)            | 0.1 (-2.0 to 2.3)               | .90     |
| Moderate or severe paravalvular leak                 | 32/2179 (1.5)             | 18/2233 (0.8)              | 0.7 (0.0 to 1.3)                | .04     |
| Moderate or severe aortic insufficiency              | 34/2393 (1.4)             | 22/2427 (0.9)              | 0.5 (-0.1 to 1.2)               | .10     |
| 30 days                                              |                           |                            |                                 |         |
| Mean gradient, mean (SD), mm Hg                      | 12.2 (5.3)                | 12.3 (5.4)                 | 0.1 (-0.4 to 0.3)               | .69     |
| Increase of mean gradient ≥ 10 mm Hg since discharge | 65/1689 (3.8)             | 44/1779 (2.5)              | 1.4 (0.1 to 2.6)                | .02     |
| Ejection fraction, mean (SD), %                      | 56.2 (11.7)               | 55.9 (12.2)                | 0.3 (-0.4 to 1.1)               | .39     |
| Moderate or severe paravalvular leak                 | 35/1711 (2.0)             | 42/1782 (2.4)              | 0.3 (-0.3 to 0.7)               | .53     |
| Moderate or severe aortic insufficiency              | 46/1896 (2.4)             | 43/1959 (2.2)              | 0.2 (-0.8 to 1.2)               | .63     |
| 1 year                                               |                           |                            |                                 |         |
| Mean gradient, mean (SD), mm Hg                      | 13.1 (8.1)                | 13.0 (6.2)                 | 0.1 (-0.7 to 0.8)               | .86     |
| Increase of mean gradient ≥ 10 mm Hg since discharge | 34/601 (5.7)              | 35/668 (5.2)               | 0.4 (-2.2 to 3.1)               | .74     |
| Ejection fraction, mean (SD), %                      | 57.7 (10.4)               | 57.5 (10.1)                | 0.2 (-0.8 to 1.3)               | .66     |
| Moderate or severe paravalvular leak                 | 19/593 (3.2)              | 17/673 (2.5)               | 0.7 (-1.3 to 2.7)               | .47     |
| Moderate or severe aortic insufficiency              | 21/675 (3.1)              | 24/746 (3.2)               | 0.1 (-2.1 to 1.9)               | .91     |

Abbreviations: AS, aortic valve stenosis; CI, confidence interval.

**eTable 10. Functional and Health Status in Matched Cohort**

|                                             | Bicuspid AS      | Tricuspid AS     | Absolute Difference<br>(95% CI) | P Value |
|---------------------------------------------|------------------|------------------|---------------------------------|---------|
| Functional status                           |                  |                  |                                 |         |
| NYHA heart failure class at 30 days         |                  |                  |                                 |         |
| Class I                                     | 1074/1958 (54.9) | 1103/2015 (54.7) | 0.1 (-3.0 to 3.3)               | .94     |
| Class II                                    | 751/1958 (38.4)  | 760/2015 (37.7)  | 0.6 (-2.4 to 3.7)               | .68     |
| Class III                                   | 123/1958 (6.3)   | 139/2015 (6.9)   | 0.6 (-2.2 to 1.0)               | .43     |
| Class IV                                    | 10/1958 (0.5)    | 13/2015 (0.6)    | 0.1 (-0.7 to 0.4)               | .58     |
| Class I/II                                  | 1825/1958 (93.2) | 1863/2015 (92.5) | 0.8 (-0.9 to 2.4)               | .36     |
| Class III/IV                                | 133/1958 (6.8)   | 152/2015 (7.5)   | 0.8 (-2.4 to 0.9)               | .36     |
| NYHA heart failure class at 1 year          |                  |                  |                                 |         |
| Class I                                     | 449/752 (59.7)   | 489/804 (60.8)   | 1.1 (-6.1 to 3.9)               | .65     |
| Class II                                    | 243/752 (32.3)   | 263/804 (32.7)   | 0.4 (-5.2 to 4.4)               | .87     |
| Class III                                   | 51/752 (6.8)     | 43/804 (5.3)     | 1.4 (-1.1 to 3.9)               | .24     |
| Class IV                                    | 9/752 (1.2)      | 9/804 (1.1)      | 0.1 (-1.1 to 1.3)               | .89     |
| Class I/II                                  | 692/752 (92.0)   | 752/804 (93.5)   | 1.5 (-4.2 to 1.2)               | .25     |
| Class III/IV                                | 60/752 (8.0)     | 52/804 (6.5)     | 1.5 (-1.2 to 4.2)               | .25     |
| Changes from baseline to 30 days            |                  |                  |                                 |         |
| Improved                                    | 1635/1946 (84.0) | 1649/1997 (82.6) | 1.4 (-0.9 to 3.8)               | .22     |
| No change                                   | 280/1946 (14.4)  | 313/1997 (15.7)  | 1.3 (-3.6 to 1.0)               | .26     |
| Worsened                                    | 31/1946 (1.6)    | 35/1997 (1.8)    | 0.2 (-1.0 to 0.7)               | .70     |
| Changes from baseline to 30 days            |                  |                  |                                 |         |
| Improved                                    | 634/745 (85.1)   | 668/800 (83.5)   | 1.6 (-2.2 to 5.4)               | .39     |
| No change                                   | 87/745 (11.7)    | 116/800 (14.5)   | 2.8 (-6.3 to 0.7)               | .10     |
| Worsened                                    | 24/745 (3.2)     | 16/800 (2.0)     | 1.2 (-0.5 to 2.9)               | .13     |
| Health status                               |                  |                  |                                 |         |
| KCCQ OS score at 30 days, median (IQR)      | 83.3 (65.8-95.1) | 83.3 (64.6-94.8) |                                 | .44     |
| Changes from baseline to 30 days, mean (SD) | 28.9 (26.3)      | 29.0 (26.9)      | 0.1 (-1.8 to 1.6)               | .89     |
| KCCQ OS score at 1 year, median (IQR)       | 86.5 (68.8-96.9) | 87.5 (71.9-96.9) |                                 | .23     |
| Changes from baseline to 30 days, mean (SD) | 30.6 (25.8)      | 33.0 (25.9)      | 2.4 (-5.1 to 0.3)               | .08     |

Abbreviations: AS, aortic valve stenosis; KCCQ-OS, Kansas City Cardiomyopathy Questionnaire overall summary; NYHA, New York Heart Association.

## Supplemental Figure Legends

### **eFigure 1. Numbers of 1-Year Follow-up Status**

The numbers of 1-year follow-up status (visit completed, death, lost to follow-up, unknown, and visit not due) in patients with bicuspid and tricuspid aortic stenosis are shown respectively.

AS indicates aortic valve stenosis. Additional events of death at 1 year was detected by CMS-linkage (10 and 16 patients with bicuspid and tricuspid aortic stenosis, respectively).

AS indicates aortic valve stenosis.

### **eFigure 2. Cumulative Event Rates of All-Cause Mortality or Stroke After Transcatheter Aortic Valve Replacement in Patients with Bicuspid and Tricuspid Aortic Stenosis**

Cumulative event rates of all-cause mortality or stroke in (A) unadjusted cohort, (B) propensity-matched cohort, (C) propensity-matched cohort only including patients with CMS-linkage, and (D) propensity-matched cohort only including patients who had CMS-linkage and completed 1-year endpoint.

AS indicates aortic valve stenosis.

### **eFigure 3. Cumulative Event Rates of All-Cause Mortality or Stroke Among Patients with Bicuspid and Tricuspid Aortic Stenosis in Propensity-Matched Cohort with CMS-Linkage**

Cumulative event rates of all-cause mortality (A) and stroke (B) in propensity-matched cohort only including patients who had CMS-linkage. Cumulative event rates of all-cause mortality (C) and stroke (D) in propensity-matched cohort only including patients who had CMS-linkage and completed 1-year endpoint. The reported *P* values were obtained from Cox proportional hazards



models. The median (interquartile range) follow-up for bicuspid and tricuspid AS group were as following: 365 days (365-365 days) and 365 days (359-365 days) in propensity-matched cohort with CMS linkage, respectively; both 365 days (365-365 days) in propensity-matched cohort with CMS linkage and 1-year end-point.

AS indicates aortic valve stenosis.

eFigure 1.

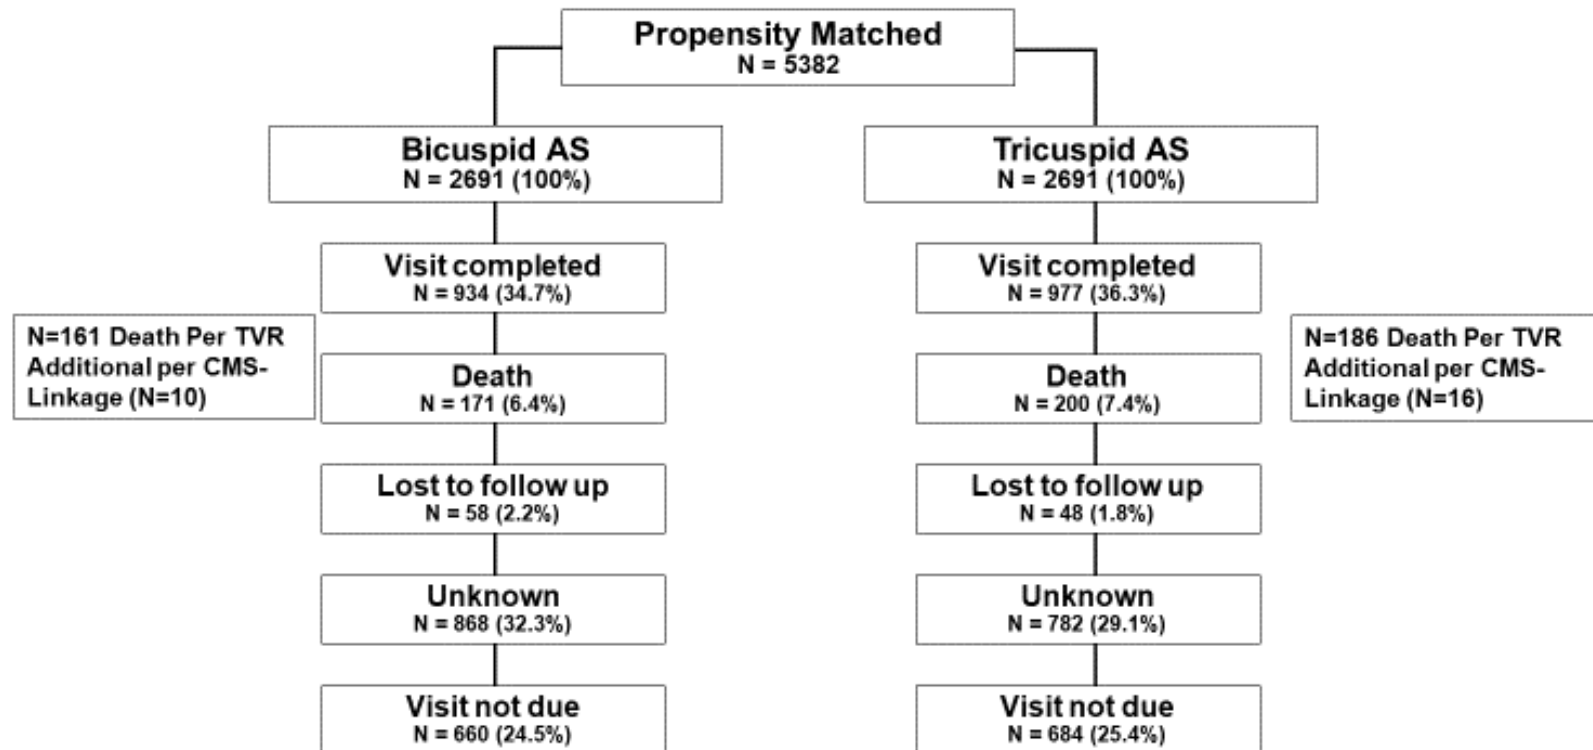

eFigure 2A.

Unmatched cohort

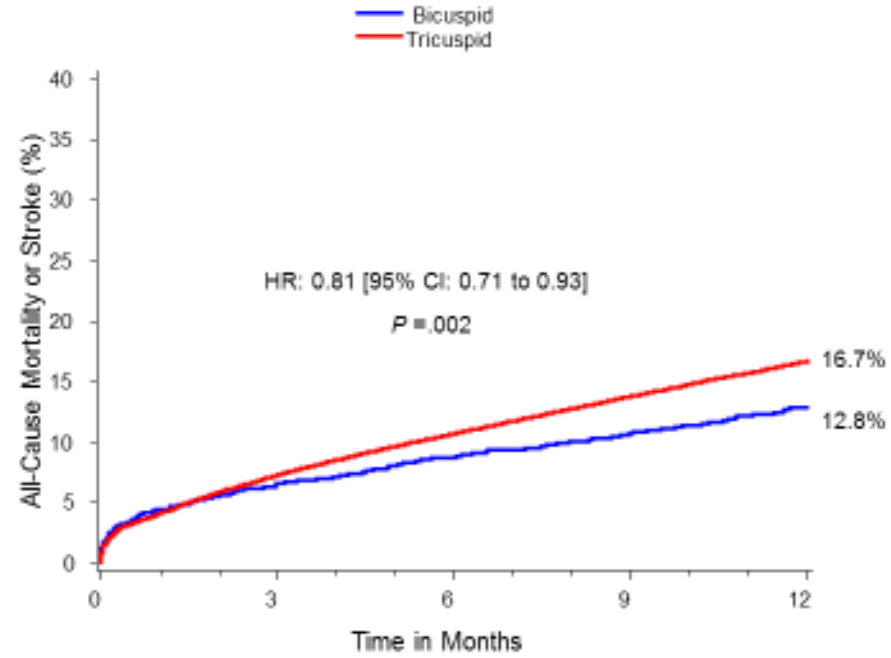

Number at risk:

|           |       |       |       |       |       |
|-----------|-------|-------|-------|-------|-------|
| Bicuspid  | 2726  | 1247  | 1209  | 1148  | 923   |
| Tricuspid | 79096 | 41049 | 39266 | 36851 | 29459 |

eFigure 2B.

Matched cohort

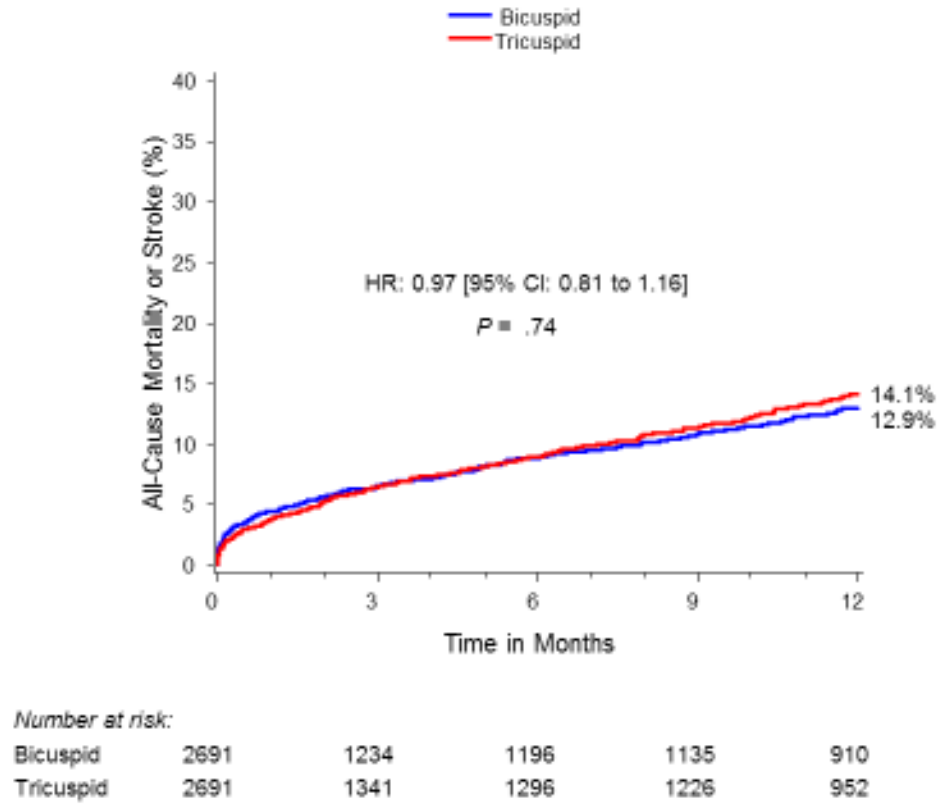

eFigure 2C.

Matched cohort in Patients  
with CMS only

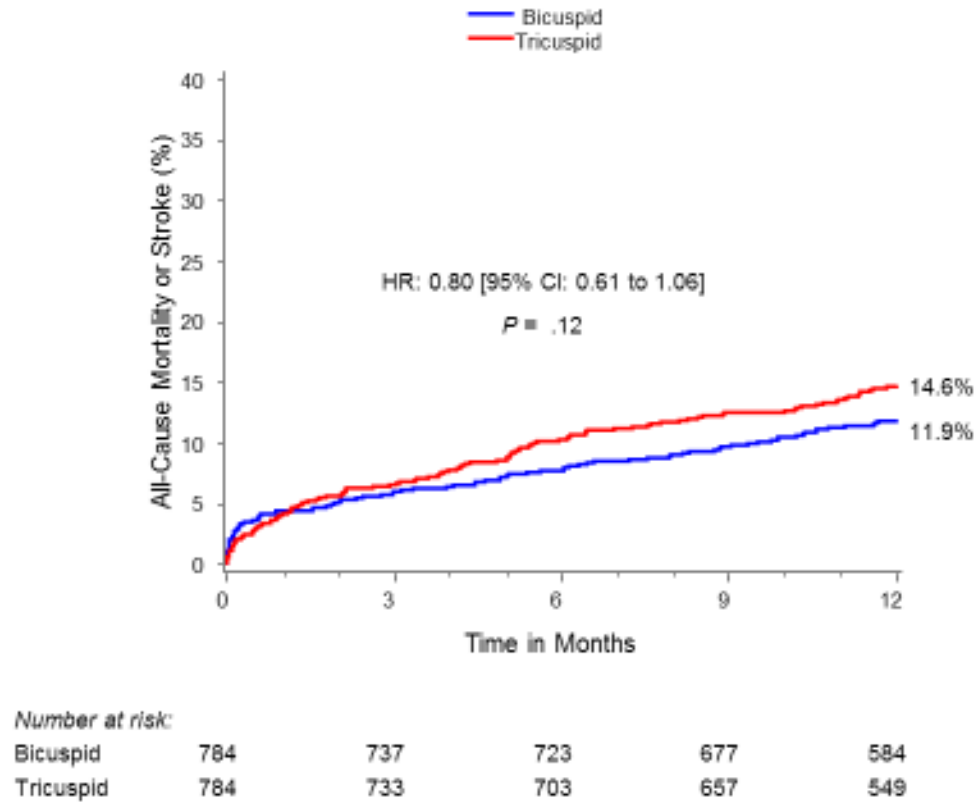

eFigure 2D.

Matched cohort in Patients with CMS only and 1-year follow-up

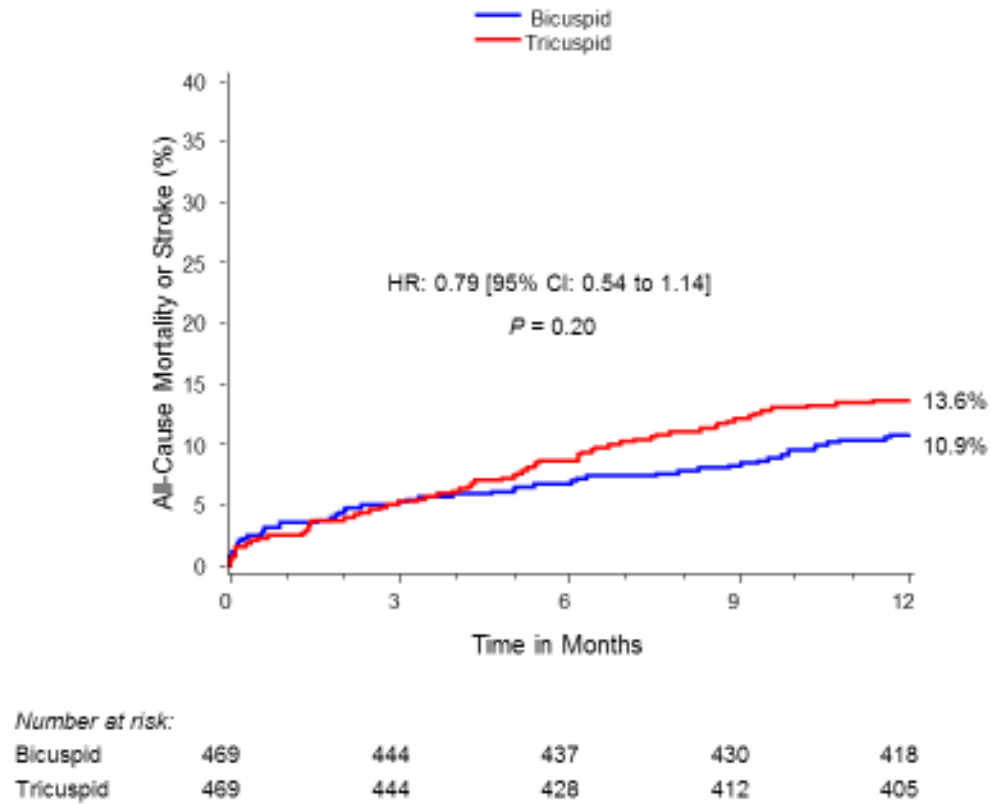

eFigure 3A.

Matched Cohort in Patients  
with CMS-Linkage only

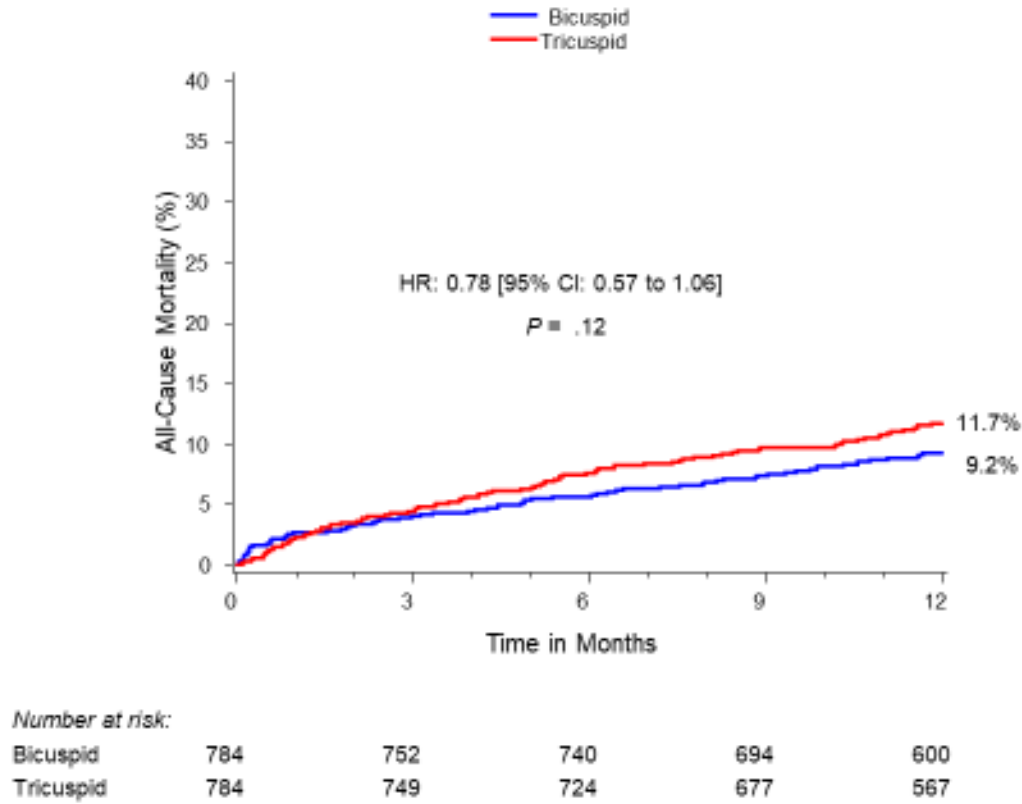

eFigure 3B.

Matched Cohort in Patients  
with CMS-Linkage only

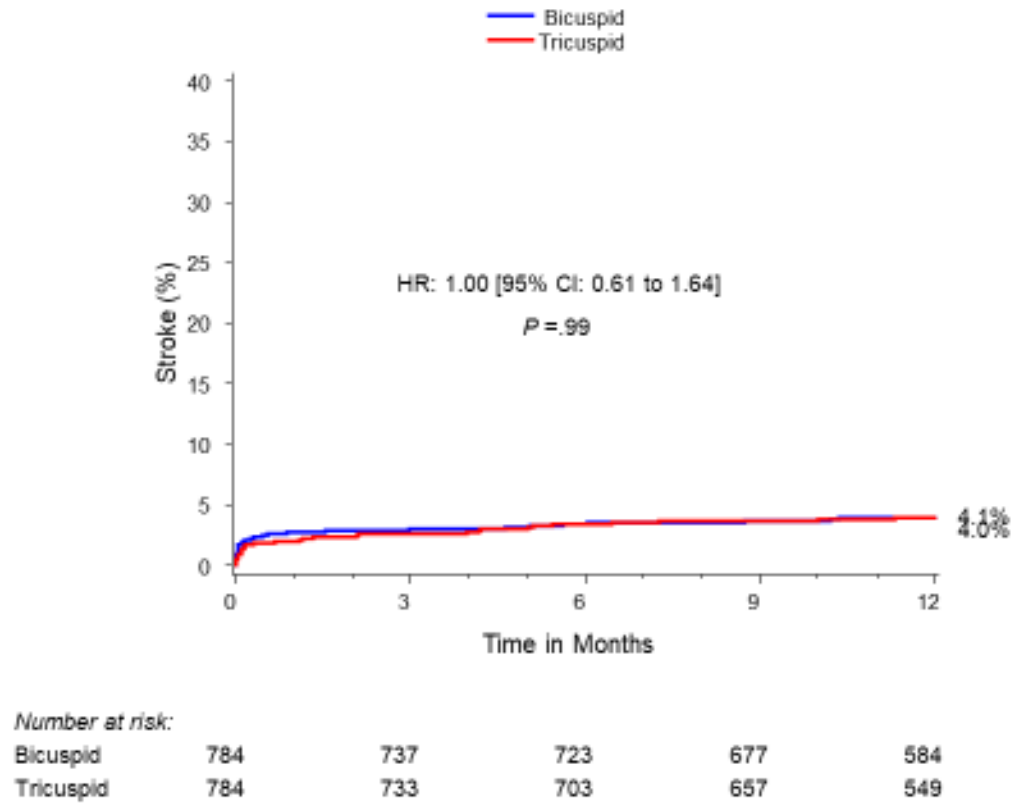



eFigure 3C.

Matched Cohort in Patients with  
CMS-Linkage and 1-year Follow-up

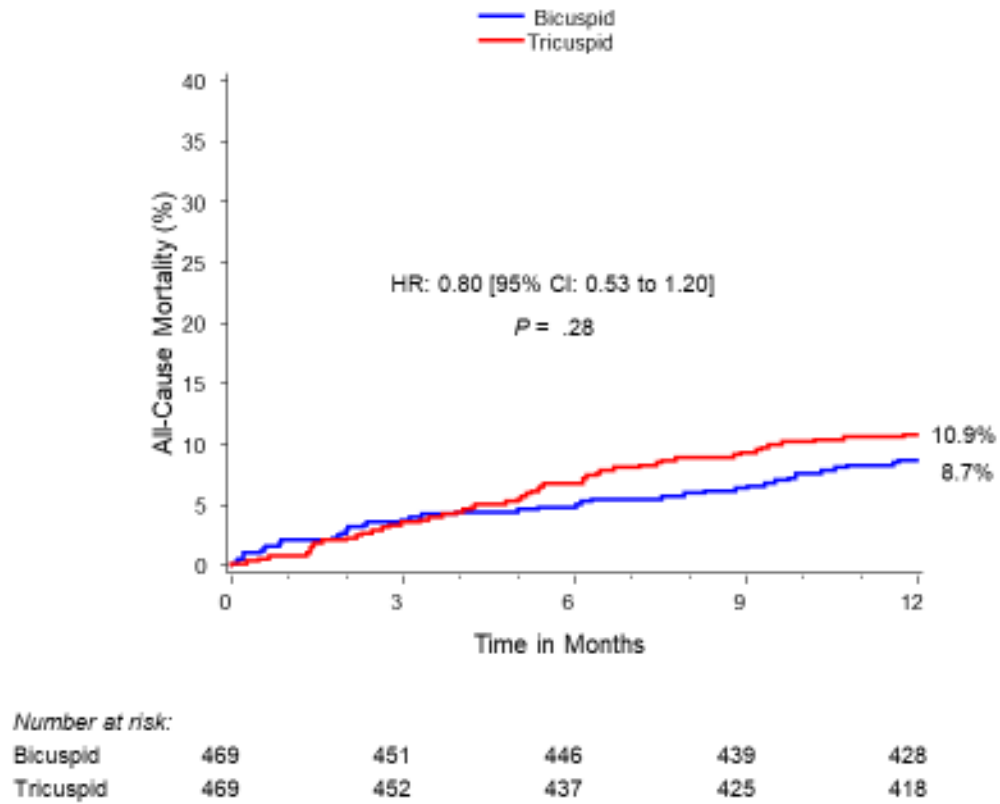

eFigure 3D.

Matched Cohort in Patients with  
CMS-Linkage and 1-year Follow-up

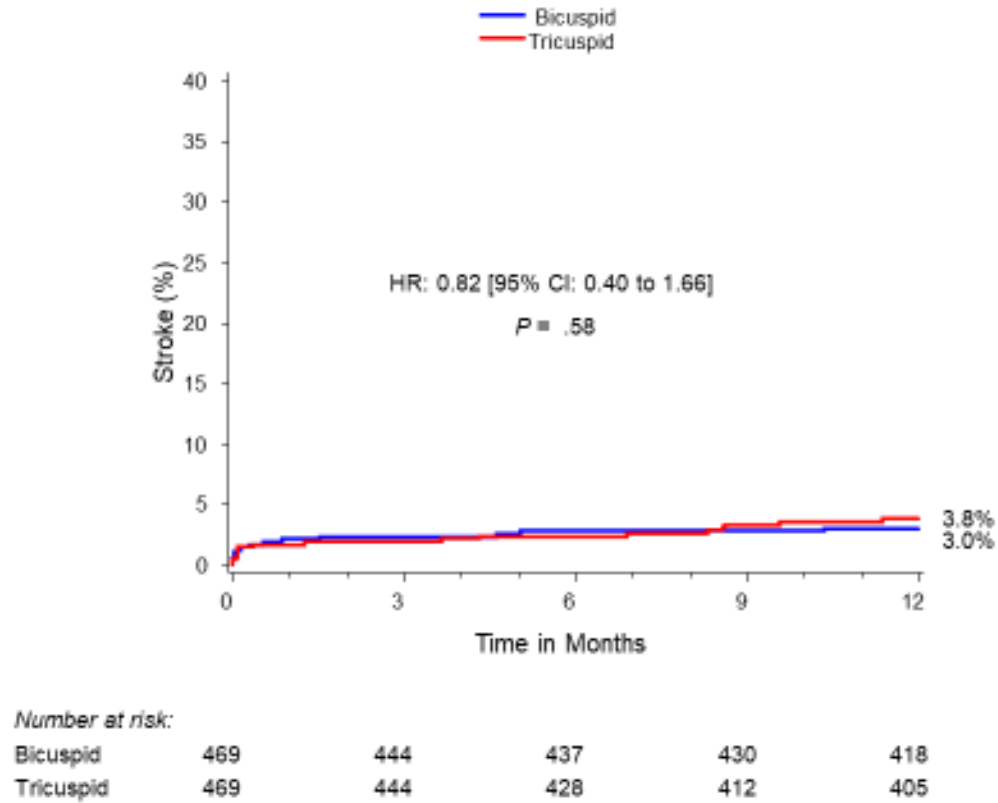

Supplement: jama-321-2193-s001.pdf [file jama-321-2193-s001.pdf]
